# Supplementary material for: Effects of Minority Stress, Group-Level Coping, and Social Support on Mental Health of German Gay Men
Source: PLoS One. 2016 Mar 4;11(3):e0150562. doi: 10.1371/journal.pone.0150562 (PMC4778907; doi:10.1371/journal.pone.0150562)
Supplement: S1 Appendix — (DOCX) [file pone.0150562.s001.docx]

Appendix

*Items from Minority Stress, Coping, and Social Support Scales*

| Scale | Item |
| --- | --- |
| Victimization | Verbal insults or threatened with physical violence1 |
| Personal property damaged or destroyed |
| Punched, kicked, beaten, or physically wounded in another way1 |
| Chased or followed |
| Sexually harassed or sexually assaulted1 |
| Rejection sensitivity | You go get an STD check-up, and the man taking your sexual history is rude towards you. |
| You go to a party, and you and your partner are the only gay people there. No one talks to you. |
| You are in a locker room in a gym. One guy nearby moves to another area to change clothes.2 |
| Internalized homonegativity | I feel ashamed of my homosexuality. |
| I sometimes resent my sexual orientation. |
| When I think of my homosexuality, I feel depressed. |
| Disclosure | How much are you out to your friends and acquaintances?2 |
| How much are you out to your relatives?2 |
| How much are you out to your supervisor, colleagues, and the people with whom you work?2 |
| Homopositivity | Gay men are more in touch with their emotions than are straight men. |
| Gay men are more articulate than straight men. |
| Gay men are better dancers than straight men. |
| Gay affirmation | I am thankful for my sexual orientation. |
| I see my homosexuality as a gift. |
| I am proud to be gay. |
| Gay rights support | Gay couples should have all the same parenting rights as heterosexuals do (e. g., adoption and fostering).2 |
| It should be acceptable for gay male couples openly to express their affection for their partners in public (e. g., kissing, holding hands, or embracing each other).2 |
| All employers should strive to develop just and favorable conditions in the workplace for gay men.2 |
| Gay rights activism | Public marches and rallies1 |
| Information stands or distribution of flyers2 |
| Collecting signatures (e.g., for a petition) or signing1 |
| Posting gay rights comments on the Internet (e.g., via Twitter or Facebook)3 |
| Boycott against [*sic*] gay-unfriendly businesses. |
| Non-gay support | Whom can you really count on to be dependable when you need help (e. g., help with moving or walking your dog)?2 |
| With how many people can you totally be yourself?2 |
| On how many people can you count to console you when you are very upset?2 |
| Gay support | How many of these people are gay men?34 |
| Somatization | Dizziness or nausea1 |
|  | Pains in heart or chest |
|  | Hot or cold spells |
| Obsessive-compulsive | Having to check and double-check what you do |
|  | Difficulty making decisions |
|  | Trouble concentrating or remembering things1 |
| Interpersonal sensitivity | Strong inhibition when interacting with others |
|  | Feeling emotionally vulnerable |
|  | Feeling inferior to others |
| Depression | Feeling lonely |
|  | Feeling no interest in things |
|  | Feelings of worthlessness |
| Anxiety | Feeling fearful |
|  | Spells of terror or panic |
|  | Feeling so restless you couldn’t sit still |
| Hostility | Feeling easily annoyed or irritated |
|  | Temper outbursts that you could not control |
|  | Getting into frequent arguments |
| Phobic anxiety | Feeling afraid in open spaces |
|  | Having to avoid certain things, places, or activities because they frighten you |
|  | Feeling uneasy in crowds |
| Paranoid ideation | Feeling others are to blame for most of your troubles |
|  | Feeling that that you are watched and talked about by others |
|  | Others not giving you proper credit for your achievements |
| Psychoticism | The idea that someone else can control your thoughts |
|  | The idea that you should be punished for your sins |
|  | The idea that something is wrong with your mind |
| Alcohol dependency | Desire to avoid or reduce negative feelings by consuming alcohol2 |
|  | Desire to reduce inhibitions by drinking alcohol2 |
|  | Difficulties at handling everyday duties (e. g., work, school, or family) as a result of consuming alcohol2 |

*Note.* 1The item was formed by combining previously distinct items of the same scale. 2The original item was changed. 3Newly created item. 4The item was presented once after each item of the previous scale.
